# Supplementary material for: Reorganized, weak C–H⋯O interactions directly modify the mechanical properties and compaction performance of a series of nitrobenzoic acids
Source: Royal Society of Chemistry journal article supplement (doi:10.1039/c7ce00238f), 2017-01-01

# **Reorganized, Weak C-H...O Interactions Directly Modify the Mechanical Properties and Compaction Performance of a Series of Nitrobenzoic Acids**

*Aditya B. Singaraju<sup>1</sup>, Kyle Nguyen<sup>1</sup>, Dale C. Swenson<sup>2</sup>, Mamta Iyer<sup>3</sup>, Rahul V. Haware<sup>3</sup> and Lewis L. Stevens<sup>1,\*</sup>*

*1. Division of Pharmaceutics and Translational Therapeutics, College of Pharmacy, The University of Iowa, Iowa City, IA 52242*

*2. X-Ray Diffraction Facility, Department of Chemistry, The University of Iowa, Iowa City, IA 52242*

*3. Division of Pharmaceutical Sciences, College of Pharmacy & Health Sciences, Campbell University, Buies Creek, NC 27506*

L. L. Stevens, corresponding author. Tel: (319)-335-8823; e-mail: lewis-stevens@uiowa.edu

## Supporting Information

**Table S1.** Geometrical parameters for all interactions (C-H...O, p-p and halogen short contacts) across the NBA series.

| Material      | Interaction   | A-X (Å) | D-A (Å) | Angle (deg.) | Motif                        |
|---------------|---------------|---------|---------|--------------|------------------------------|
| <b>4-NBA</b>  | C2-H2...O3    | 2.555   | 3.445   | 156          | 1-d tape                     |
|               | C5-H4...O1    | 2.489   | 3.374   | 155          | 1-d tape                     |
|               | C6-H5...O2    | 2.577   | 3.416   | 147          | 1-d tape                     |
|               | C3-H3...O4    | 2.515   | 3.384   | 152          | Inter-tape                   |
|               | $\pi$ - $\pi$ | ---     | 5.187   | ---          | Ring-to-ring                 |
| <b>3-NBA</b>  | C8-H4...O7    | 2.474   | 3.275   | 144          | 1-d tape                     |
|               | C7-H3...O8    | 2.661   | 3.455   | 145          | 1-d tape                     |
|               | C9-H5...O6    | 2.507   | 3.353   | 129          | 1-d tape                     |
|               | C3-H1...O8    | 2.540   | 3.393   | 155          | Inter-tape                   |
|               | C10-H6...O1   | 2.465   | 3.418   | 152          | Inter-tape                   |
| <b>Cl-NBA</b> | C5-H2...O2    | 2.555   | 3.406   | 151          | 1-d tape                     |
|               | C6-H3...O1    | 2.515   | 3.475   | 153          | 1-d tape                     |
|               | C2-H1...O4    | 2.612   | 3.326   | 134          | Inter-tape                   |
|               | C4-Cl1...O4   | 2.897   | 2.977   | 70           | Intramolecular short contact |
|               | $\pi$ - $\pi$ | ---     | 4.559   | ---          | Ring-to-ring                 |
| <b>Br-NBA</b> | C5-H5...O4    | 2.570   | 3.435   | 152          | 1-d tape                     |
|               | C6-H6...O3    | 2.499   | 3.383   | 155          | 1-d tape                     |
|               | C3-H3...O1    | 2.612   | 3.306   | 130          | Inter-tape                   |
|               | C1-Br1...O1   | 3.231   | 5.050   | 70           | Inter-tape short contact     |
|               | $\pi$ - $\pi$ | ---     | 4.485   | ---          | Ring-to-ring                 |
| <b>Me-NBA</b> | C16-H16...O4  | 2.498   | 3.491   | 158          | 1-d tape                     |
|               | C5-H5...O17   | 2.860   | 3.569   | 155          | 1-d tape                     |
|               | C6-H6...O8    | 2.793   | 3.672   | 130          | 1-d tape                     |
|               | $\pi$ - $\pi$ | ---     | 4.683   | ---          | Ring-to-ring                 |

**Figure S1.** PXRD overlay of experimental and predicted patterns for a.) 3-NBA, b.) 4-NBA, c.) Cl-NBA, d.) Br-NBA and e.) Me-NBA.

**Experimental and Calculated Powder Patterns for 3-NBA**

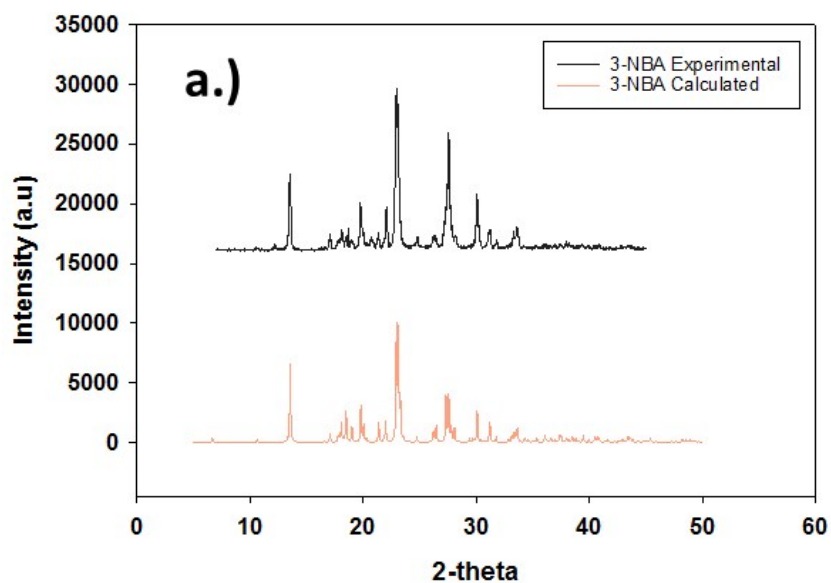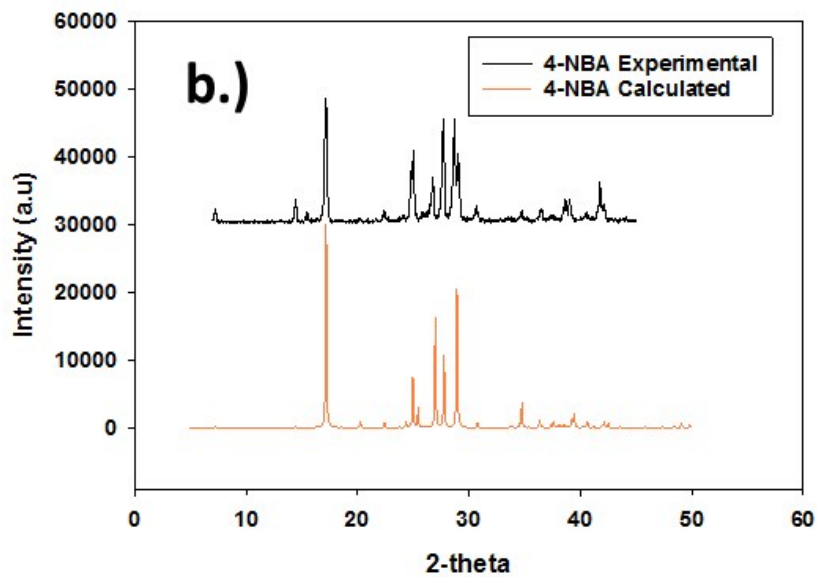

### Experimental and Calculated Powder Patterns for Cl-NBA

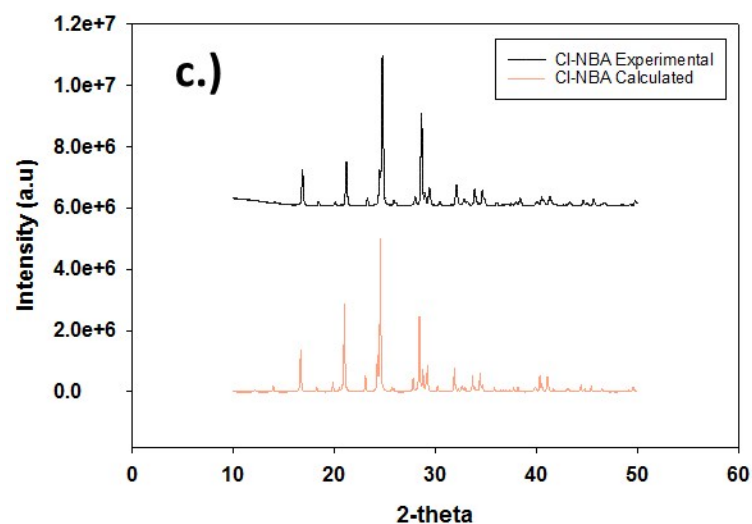

### Experimental and Calculated Powder Patterns for Br-NBA

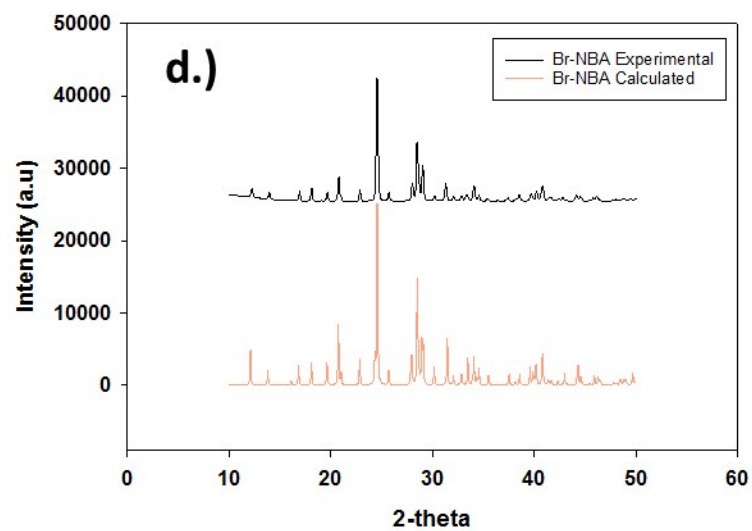

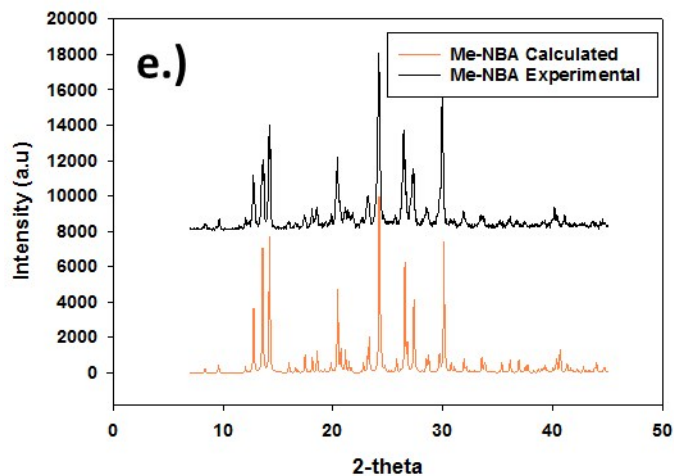

**Figure S2.** In-Die Heckel Plots for a.) 3-NBA, b.) 4-NBA, c.) Cl-NBA, d.) Br-NBA and e) Me-NBA

**Figure S2a.)**

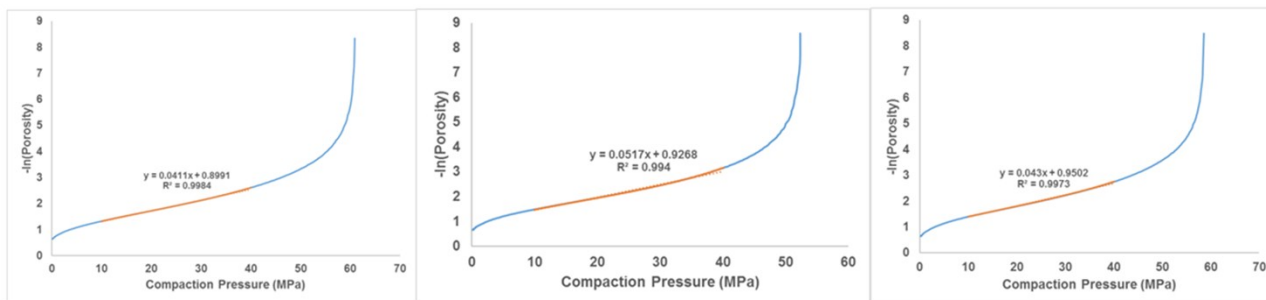

**Figure S2b.)**

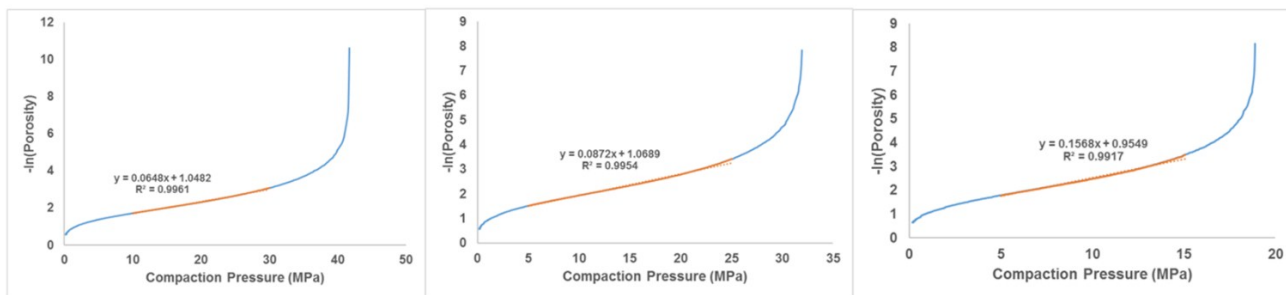

Figure S2c.)

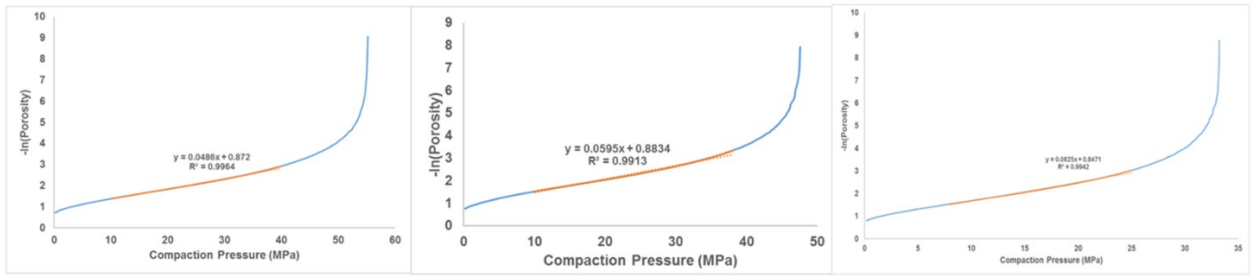

Figure S2d.)

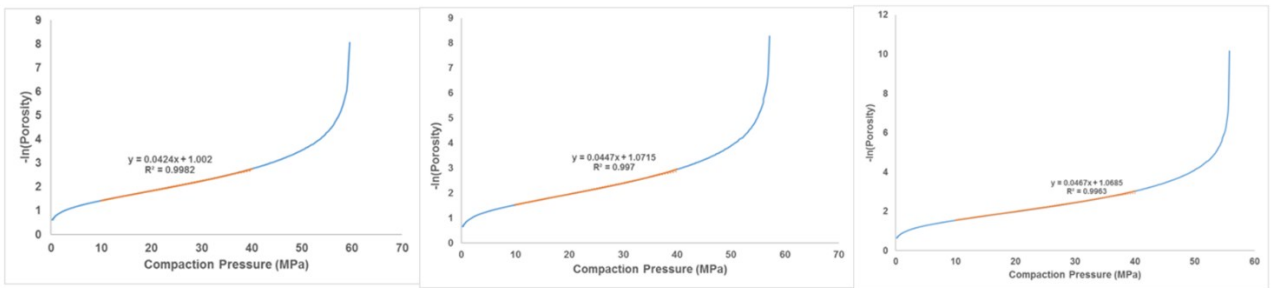

Figure S2e.)

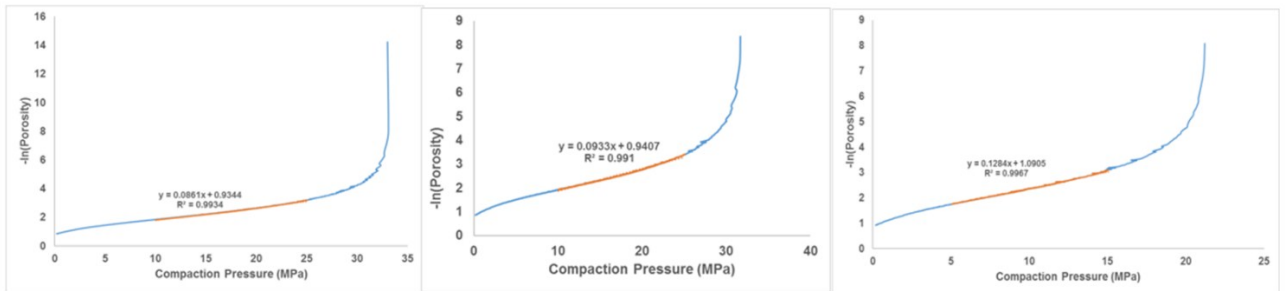

**Figure S3.** SEM Images for a.) 3-NBA, b.) 4-NBA, c.) Cl-NBA, d.) Br-NBA and e) Me-NBA  
**Figure S3a.)**

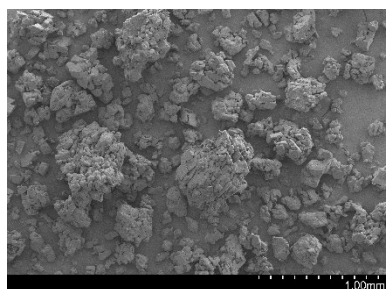

**Figure S3b.)**

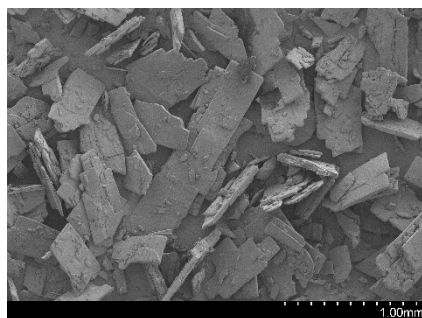

**Figure S3c.)**

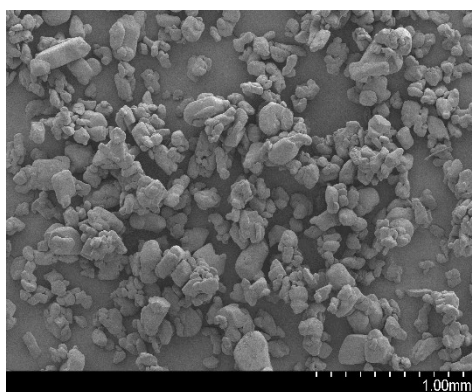

**Figure S3d.)**

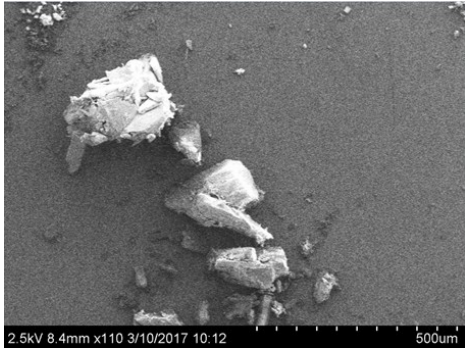

**Figure S3e.)**

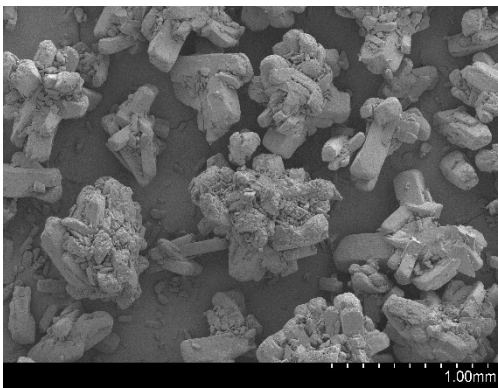

Supplement: c7ce00238f1.pdf [file c7ce00238f1.pdf]
